# Supplementary material for: Competition between Li+ and Na+ in sodium transporters and receptors: Which Na+-Binding sites are “therapeutic” Li+ targets?
Source: PubMed Central journal article supplement (PMC5944251; doi:10.1039/c7sc05284g), 2018-04-02
Supplement: SC-009-C7SC05284G-s001.pdf [file SC-009-C7SC05284G-s001.pdf]

Supporting Information

**Competition Between  $\text{Li}^+$  and  $\text{Na}^+$  in Sodium Transporters and Receptors: Which  $\text{Na}^+$ -  
Binding Sites are “Therapeutic”  $\text{Li}^+$  Targets?**

Todor Dudev,<sup>a,\*</sup> Karine Mazmanian,<sup>b,c</sup> and Carmay Lim<sup>b,d,\*</sup>

<sup>a</sup>Faculty of Chemistry and Pharmacy, Sofia University, Sofia 1164, Bulgaria

<sup>b</sup>Institute of Biomedical Sciences, Academia Sinica, Taipei 11529, Taiwan

<sup>c</sup>Chemical Biology and Molecular Biophysics Program, Taiwan International Graduate Program, Academia Sinica, Taipei 11529, Taiwan

<sup>d</sup>Department of Chemistry, National Tsing Hua University, Hsinchu 300, Taiwan

**Table S1.** PDB entries of the transporter and receptor structures with Na<sup>+</sup>.<sup>a</sup>

| PDB ID | Protein                                  | Resolution (Å) | CATH code                           | Other PDB structures with sodium                                                                                                                                                                                                               |
|--------|------------------------------------------|----------------|-------------------------------------|------------------------------------------------------------------------------------------------------------------------------------------------------------------------------------------------------------------------------------------------|
| 2A65   | Leucine transporter LeuT                 | 1.65           | N/A                                 | 2Q6H, 2Q72, 2QB4, 2QEI, 3F3A, 3F3C, 3F3D, 3F3E, 3F48, 3F4I, 3F4J, 3GJC, 3GJD, 3GWU, 3GWV, 3GWW, 3MPN, 3MPQ, 3QS4, 3QS5, 3QS6, 3TT1, 3TT3, 3TU0, 3USG, 3USI, 3USJ, 3USK, 3USL, 3USM, 3USO, 3USP, 4FXZ, 4FY0, 4HMK, 4HOD, 4MM4, 5JAE, 5JAF, 5JAG |
| 3KBC   | Aspartate transporter GltPh              | 3.51           | 1.10.38<br>60.10                    | 2NWX, 3KBC, 3V8F, 3V8G, 4IZM, 4OYF, 4X2S, 5CFY                                                                                                                                                                                                 |
| 4XP1   | Dopamine transporter DAT                 | 2.89           | N/A                                 | 4M48, 4XNX, 4XP1, 4XP4, 4XP5, 4XP6, 4XP9, 4XPA, 4XPB, 4XPF, 4XPG, 4XPH, 4XPT                                                                                                                                                                   |
| 5E9S   | Glutamate transporter GltTk              | 2.80           | N/A                                 | N/A                                                                                                                                                                                                                                            |
| 5I71   | Serotonin transporter SERT               | 3.15           | N/A                                 | 5I6X, 5I71, 5I73, 5I75, 6AWN, 6AWO, 6AWP, 6AWQ                                                                                                                                                                                                 |
| 5LM4   | Glutamate transporter GLAST1/EAAT        | 3.10           | N/A                                 | 5LLM, 5LLU, 5LM4                                                                                                                                                                                                                               |
| 3C32   | Glutamate receptor kainate GluK1 (GluR5) | 1.72           | 3.40.19<br>0.10                     | N/A                                                                                                                                                                                                                                            |
| 3G3F   | Glutamate receptor kainate GluK2 (GluR6) | 1.38           | 3.40.19<br>0.10                     | 2XXR, 2XXT, 2XXU, 3G3F, 3G3G, 3G3H, 3G3I, 3G3J, 3G3K, 3OM1, 4BDL, 4BDN, 4BDO, 4BDQ, 4BDR                                                                                                                                                       |
| 3S9E   | Glutamate receptor kainate GluK3 (GluR7) | 1.60           | 3.40.19<br>0.10                     | N/A                                                                                                                                                                                                                                            |
| 3OM1   | Glutamate receptor kainate GluK5 (KA2)   | 1.68           | 3.40.50<br>.2300                    | N/A                                                                                                                                                                                                                                            |
| 3VW7   | GPCR receptor Protease-activated PAR1    | 2.20           | 1.20.10<br>70.10<br>1.10.53<br>0.40 | N/A                                                                                                                                                                                                                                            |

|      |                                              |      |                                     |                                                                           |
|------|----------------------------------------------|------|-------------------------------------|---------------------------------------------------------------------------|
| 4BVN | GPCR receptor<br>Adrenergic<br>b1AR          | 2.10 | 1.20.10<br>70.10                    | 2VT4, 2Y00, 2Y02, 2Y03, 2Y04, 2YCW,<br>2YCY, 3ZPQ, 3ZPR, 4AMJ, 4BVN, 5A8E |
| 4EIY | GPCR receptor<br>Adenosine<br>A2AAR          | 1.80 | 1.20.10<br>70.10<br>1.20.12<br>0.10 | N/A                                                                       |
| 4LDE | GPCR receptor<br>Adrenergic<br>b2AR          | 2.79 | 1.10.53<br>0.40<br>1.20.10<br>70.10 | 4LDE, 4LDL, 4LDO, 4QKX                                                    |
| 4N6H | GPCR receptor<br>Opioid d-OR                 | 1.80 | 1.20.12<br>0.10<br>1.20.10<br>70.10 | 4N6H, 4RWD                                                                |
| 5NDD | GPCR receptor<br>Protease-<br>activated PAR2 | 2.80 | N/A                                 | 5NDD, 5NDZ                                                                |

**Table S2.** Relative % SASA and hydrogen bonds (HBs) made by the Na<sup>+</sup>-coordinating residues in the representative PDB structures.

| Na <sup>+</sup> -binding residues              | % SASA | # of HB (as an acceptor) | # of HB (as a donor) | HB-partner residues                                                                 |
|------------------------------------------------|--------|--------------------------|----------------------|-------------------------------------------------------------------------------------|
| <b>Leucine transporter LeuT <u>2A65</u></b>    |        |                          |                      |                                                                                     |
| <b>Na1:</b>                                    |        |                          |                      |                                                                                     |
| Ala22                                          | 0.41   | —                        | 1                    | Met18 <sup>MM</sup>                                                                 |
| Asn27                                          | 0      | 1                        | 1                    | Gly24 <sup>MS</sup> Gly24 <sup>MM</sup>                                             |
| Thr254                                         | 0      | —                        | 2                    | Glu290 <sup>SS</sup> Gln250 <sup>MM</sup>                                           |
| Asn286                                         | 0      | 1                        | 2                    | Glu287 <sup>SS</sup> Ala282 <sup>MM</sup> Glu290 <sup>MM</sup>                      |
| Leu (substrate)                                | 0      | 2                        | 2                    | Gly26 <sup>MM</sup> Tyr108 <sup>SM</sup> Phe253 <sup>MM</sup> Ser256 <sup>MS</sup>  |
| <b>Na2:</b>                                    |        |                          |                      |                                                                                     |
| Gly20                                          | 0      | —                        | 1                    | Leu16 <sup>MM</sup>                                                                 |
| Val23                                          | 3.17   | —                        | 1                    | Ala19 <sup>MM</sup>                                                                 |
| Ala351                                         | 0      | —                        | 1                    | Leu347 <sup>MM</sup>                                                                |
| Thr354                                         | 0      | 1                        | 2                    | Phe350 <sup>SM</sup> Phe350 <sup>MM</sup> H <sub>2</sub> O <sup>HM</sup>            |
| Ser355                                         | 0      | 2                        | 2                    | Asn21 <sup>SM</sup> Gly352 <sup>MM</sup> Ala358 <sup>MM</sup> Ile359 <sup>MM</sup>  |
| <b>Aspartate transporter GltPh <u>3KBC</u></b> |        |                          |                      |                                                                                     |
| <b>Na1:</b>                                    |        |                          |                      |                                                                                     |
| Gly306                                         | 0      | —                        | 1                    | Thr302 <sup>MM</sup>                                                                |
| Asn310                                         | 1.2    | 1                        | —                    | Thr92 <sup>SS</sup>                                                                 |
| Asn401                                         | 0      | 1                        | 2                    | Gly313 <sup>MS</sup> Arg397 <sup>MM</sup> Asp500 <sup>SM</sup>                      |
| Asp405                                         | 3.0    | 3                        | 1                    | Val402 <sup>MM</sup> Gly408 <sup>MM</sup> Thr409 <sup>MM</sup> Thr409 <sup>SM</sup> |
| <b>Na2:</b>                                    |        |                          |                      |                                                                                     |
| Thr308                                         | 47.5   | —                        | 2                    | Leu305 <sup>SM</sup> Leu305 <sup>MM</sup>                                           |
| Ser349                                         | 0.3    | —                        | 3                    | Ala345 <sup>MM</sup> Ala345 <sup>SM</sup> Val346 <sup>SM</sup>                      |
| Ile350                                         | 16.8   | —                        | 1                    | Val346 <sup>MM</sup>                                                                |
| Thr352                                         | 1.3    | —                        | 2                    | Ala348 <sup>MM</sup> Ala348 <sup>SM</sup>                                           |
| <b>Dopamine transporter DAT <u>4XP1</u></b>    |        |                          |                      |                                                                                     |
| <b>Na1:</b>                                    |        |                          |                      |                                                                                     |
| Ala44                                          | 0      | —                        | 1                    | Val40 <sup>MM</sup>                                                                 |
| Asn49                                          | 0.1    | 1                        | 2                    | Asp46 <sup>MS</sup> Ser356 <sup>SS</sup> Asp46 <sup>MM</sup>                        |
| Ser320                                         | 1      | —                        | 1                    | Gln316 <sup>MM</sup>                                                                |
| Asn352                                         | 0.7    | 1                        | 2                    | Thr348 <sup>MM</sup> Ser349 <sup>MM</sup> Ser356 <sup>MM</sup>                      |
| <b>Na2:</b>                                    |        |                          |                      |                                                                                     |
| Gly42                                          | 0.5    | —                        | 1                    | Leu38 <sup>MM</sup>                                                                 |
| Val45                                          | 0.9    | —                        | 1                    | Ile41 <sup>MM</sup>                                                                 |
| Leu417                                         | 0.5    | —                        | 2                    | Met413 <sup>MM</sup> Leu414 <sup>MM</sup>                                           |
| Asp420                                         | 0      | 3                        | —                    | Thr268 <sup>SS</sup> Gly424 <sup>MM</sup> H <sub>2</sub> O <sup>HM</sup>            |

|                                                          |      |   |   |                                                                                                             |
|----------------------------------------------------------|------|---|---|-------------------------------------------------------------------------------------------------------------|
| Ser421                                                   | 0    | 1 | 2 | Phe43 <sup>SM</sup> Asp46 <sup>SS</sup> Gly425 <sup>MM</sup>                                                |
| <b>Glutamate transporter GltTk <u>5E9S</u></b>           |      |   |   |                                                                                                             |
| <b>Na1:</b>                                              |      |   |   |                                                                                                             |
| Gly309                                                   | 0    | 1 | 1 | Asn313 <sup>MM</sup> Thr305 <sup>MM</sup>                                                                   |
| Asn313                                                   | 0    | — | 3 | Asn313 <sup>SM</sup> (intraresidue HB) Gly309 <sup>MM</sup> Asp409 <sup>SS</sup>                            |
| Asn405                                                   | 0    | 2 | 1 | Gly316 <sup>MS</sup> Thr317 <sup>MS</sup> Thr317 <sup>SS</sup>                                              |
| Asp409                                                   | 1.8  | 3 | 1 | Asp409 <sup>SS</sup> Thr413 <sup>MM</sup> Thr413 <sup>SM</sup> Val406 <sup>MM</sup>                         |
| <b>Na2:</b>                                              |      |   |   |                                                                                                             |
| Thr311                                                   | 0.3  | — | 1 | Leu308 <sup>MM</sup>                                                                                        |
| Ser352                                                   | 0.1  | — | 4 | Ala348 <sup>MM</sup> Ala348 <sup>SM</sup> Val349 <sup>SM</sup> Met314 <sup>SM</sup>                         |
| Ile353                                                   | 7.1  | — | 1 | Val349 <sup>MM</sup>                                                                                        |
| Thr355                                                   | 0    | — | 2 | Ala351 <sup>MM</sup> Ala356 <sup>SM</sup>                                                                   |
| <b>Na3:</b>                                              |      |   |   |                                                                                                             |
| Tyr91                                                    | 1.2  | — | 2 | Thr305 <sup>SM</sup> Ile87 <sup>MM</sup>                                                                    |
| Thr94                                                    | 1.2  | 2 | 3 | Tyr90 <sup>SM</sup> Asp315 <sup>SS</sup> Tyr90 <sup>MM</sup> Ala98 <sup>MM</sup> Gln244 <sup>SM</sup>       |
| Ser95                                                    | 2.6  | 2 | — | Ala98 <sup>MM</sup> Val99 <sup>MM</sup>                                                                     |
| Asn313                                                   | 0    | — | 3 | Gly309 <sup>MM</sup> Asn313 <sup>SM</sup> (intraresidue HB)<br>Asp409 <sup>SS</sup>                         |
| Asp315                                                   | 0    | 4 | — | Leu319 <sup>MM</sup> Thr94 <sup>SS</sup> Gln244 <sup>SS</sup> Tyr249 <sup>SS</sup>                          |
| <b>Serotonin transporter SERT <u>5I7I</u></b>            |      |   |   |                                                                                                             |
| <b>Na1:</b>                                              |      |   |   |                                                                                                             |
| Ala96                                                    | 0.9  | — | 1 | Val92 <sup>MM</sup>                                                                                         |
| Asn101                                                   | 1    | — | 3 | Asn368 <sup>SM</sup> Ser372 <sup>SS</sup> Asp98 <sup>MS</sup>                                               |
| Ser336                                                   | 4.7  | 1 | 1 | Gln332 <sup>MM</sup> Asn368 <sup>SS</sup>                                                                   |
| Asn368                                                   | 6.7  | 3 | 2 | Asn101 <sup>SM</sup> Ser372 <sup>MM</sup> Ser372 <sup>SM</sup> Ser336 <sup>SS</sup><br>Thr364 <sup>MM</sup> |
| <b>Na2:</b>                                              |      |   |   |                                                                                                             |
| Gly94                                                    | 2.4  | — | 1 | Leu90 <sup>MM</sup>                                                                                         |
| Val97                                                    | 3.8  | — | 1 | Ile93 <sup>MM</sup>                                                                                         |
| Leu434                                                   | 0.7  | — | 2 | Met430 <sup>MM</sup> Leu431 <sup>MM</sup>                                                                   |
| Asp437                                                   | 3    | 2 | 1 | Thr284 <sup>SS</sup> Asp437 <sup>MS</sup> (intraresidue HB) Ala441 <sup>MM</sup>                            |
| Ser438                                                   | 0    | 1 | 1 | Tyr95 <sup>SM</sup> Gly442 <sup>MM</sup>                                                                    |
| <b>Glutamate transporter GLAST1/EAAT <u>5LM4</u></b>     |      |   |   |                                                                                                             |
| Thr376                                                   | 7    | — | — | —                                                                                                           |
| Ser417                                                   | 0    | — | 2 | Met379 <sup>SM</sup> Ala413 <sup>MM</sup>                                                                   |
| Ala420                                                   | 1.9  | — | 1 | Ala416 <sup>MM</sup>                                                                                        |
| Ile418                                                   | 34.9 | — | 1 | Thr414 <sup>MM</sup>                                                                                        |
| <b>Glutamate receptor Kainate GluR5 (K1) <u>3C32</u></b> |      |   |   |                                                                                                             |
| Glu96                                                    | 0    | 2 | 1 | Thr92 <sup>MM</sup> Phe101 <sup>MS</sup> Lys103 <sup>SS</sup>                                               |
| Ile99                                                    | 0    | — | 1 | Arg95 <sup>MM</sup>                                                                                         |
| Asp100                                                   | 0    | 5 | 1 | Gly223 <sup>MS</sup> 3H <sub>2</sub> O <sup>HS</sup> 2Thr220 <sup>MM</sup>                                  |

| <b>Glutamate receptor Kainate GluR6 (K2) <u>3G3F</u></b>           |      |   |   |                                                                                                                                          |
|--------------------------------------------------------------------|------|---|---|------------------------------------------------------------------------------------------------------------------------------------------|
| Glu97                                                              | 0    | 3 | 1 | Thr93 <sup>MM</sup> Lys104 <sup>SS</sup> Arg228 <sup>SS</sup> H <sub>2</sub> O <sup>HS</sup>                                             |
| Ile100                                                             | 0    | — | 1 | Arg96 <sup>MM</sup>                                                                                                                      |
| Asp101                                                             | 0    | 5 | 1 | Gly224 <sup>MS</sup> Arg228 <sup>SS</sup> 2H <sub>2</sub> O <sup>HS</sup> Thr221 <sup>MM</sup> Thr221 <sup>MM</sup>                      |
| <b>Glutamate receptor Kainate K5 (KA2) <u>3OM1</u></b>             |      |   |   |                                                                                                                                          |
| Phe162                                                             | 0    | — | 1 | Leu158 <sup>MM</sup>                                                                                                                     |
| Ser165                                                             | 5.3  | 1 | — | Glu167 <sup>MS</sup>                                                                                                                     |
| Glu167                                                             | 15.6 | 1 | 1 | Ser165 <sup>MS</sup> H <sub>2</sub> O <sup>HS</sup>                                                                                      |
| <b>Glutamate receptor Kainate GluR7 (K3) <u>3S9E (chain B)</u></b> |      |   |   |                                                                                                                                          |
| <b>Na1:</b>                                                        |      |   |   |                                                                                                                                          |
| Ser24                                                              | 24.9 | 1 | — | H <sub>2</sub> O <sup>HM</sup>                                                                                                           |
| Arg26                                                              | 54.9 | — | 2 | Asp32 <sup>SS</sup> H <sub>2</sub> O <sup>SH</sup>                                                                                       |
| <b>Na2:</b>                                                        |      |   |   |                                                                                                                                          |
| Asn5                                                               | 80.7 | 2 | — | 2H <sub>2</sub> O <sup>HS</sup>                                                                                                          |
| Ser52                                                              | 31.3 | 1 | 1 | Ser7 <sup>SS</sup> Leu8 <sup>MM</sup>                                                                                                    |
| <b>GPCR receptor Protease-activated PAR1 <u>3VW7</u></b>           |      |   |   |                                                                                                                                          |
| Ser189                                                             | 2.3  | 1 | 3 | Asn185 <sup>MM</sup> Asn185 <sup>SM</sup> Asn185 <sup>SS</sup> Met193 <sup>MM</sup>                                                      |
| Asp148                                                             | 0.4  | 2 | 1 | Leu144 <sup>MM</sup> Val152 <sup>MM</sup> Asn185 <sup>SS</sup>                                                                           |
| Asp367                                                             | 1.7  | 3 | 1 | Ser363 <sup>MM</sup> Ile370 <sup>MM</sup> Tyr371 <sup>MM</sup> H <sub>2</sub> O <sup>HS</sup>                                            |
| <b>GPCR receptor Adrenergic b1AR <u>4BVN</u></b>                   |      |   |   |                                                                                                                                          |
| <b>Na1:</b>                                                        |      |   |   |                                                                                                                                          |
| Cys198                                                             | 20   | — | 1 | Asp195 <sup>MM</sup>                                                                                                                     |
| Cys192                                                             | 6.1  | 1 | 1 | Asp195 <sup>MM</sup> Gln188 <sup>MM</sup>                                                                                                |
| Asp195                                                             | 42.4 | 2 | 2 | Lys191 <sup>MM</sup> Cys192 <sup>MM</sup> Cys198 <sup>MM</sup> Gly197 <sup>MS</sup>                                                      |
| <b>Na2:</b>                                                        |      |   |   |                                                                                                                                          |
| Asp87                                                              | 0    | 5 | 1 | Leu83 <sup>MM</sup> Gly91 <sup>MM</sup> Ser336 <sup>SS</sup> 3H <sub>2</sub> O <sup>HS</sup>                                             |
| Ser128                                                             | 0.2  | 1 | 2 | Cys124 <sup>MM</sup> Cys124 <sup>SM</sup> Leu132 <sup>MM</sup>                                                                           |
| <b>GPCR receptor Adenosine A2AAR <u>4E1Y</u></b>                   |      |   |   |                                                                                                                                          |
| Asp52                                                              | 0    | 4 | — | Ser281 <sup>SS</sup> 3H <sub>2</sub> O <sup>HS</sup>                                                                                     |
| Ser91                                                              | 0    | — | 1 | Leu87 <sup>SM</sup>                                                                                                                      |
| <b>GPCR receptor Adrenergic b2AR <u>4LDE</u></b>                   |      |   |   |                                                                                                                                          |
| Asn1103                                                            | 5.8  | 1 | 2 | Glu1188 <sup>MS</sup> H <sub>2</sub> O <sup>MH</sup> Glu1107 <sup>MM</sup>                                                               |
| Glu1187                                                            | 28   | 1 | 1 | Asn1183 <sup>MM</sup> Thr1189 <sup>SS</sup>                                                                                              |
| Cys1184                                                            | 2.9  | — | 1 | Glu1180 <sup>MM</sup>                                                                                                                    |
| Cys1190                                                            | 8.4  | — | — | —                                                                                                                                        |
| <b>GPCR receptor Opioid d-OR <u>4N6H</u></b>                       |      |   |   |                                                                                                                                          |
| Asp95                                                              | 0    | 6 | 1 | Ser311 <sup>SS</sup> Asn314 <sup>SS</sup> 2H <sub>2</sub> O <sup>HS</sup> Thr99 <sup>MM</sup> Thr99 <sup>SM</sup><br>Leu91 <sup>MM</sup> |
| Ser135                                                             | 0    | 1 | 2 | Asn131 <sup>MM</sup> Asn131 <sup>SM</sup> Leu139 <sup>MM</sup>                                                                           |
| Asn131                                                             | 1.1  | 2 | 3 | Ile127 <sup>MM</sup> Ser135 <sup>MM</sup> Ser135 <sup>SM</sup> 2H <sub>2</sub> O <sup>SH</sup>                                           |

| <b>GPCR receptor Protease-activated PAR2 <u>5NDD</u></b> |     |   |   |                                                                                               |
|----------------------------------------------------------|-----|---|---|-----------------------------------------------------------------------------------------------|
| Asp121                                                   | 0.4 | 2 | 1 | Leu117 <sup>MM</sup> Ser124 <sup>MM</sup> Val125 <sup>MM</sup>                                |
| Asp340                                                   | 0   | 3 | 1 | Asn336 <sup>MM</sup> Val343 <sup>MM</sup> Tyr344 <sup>MM</sup> H <sub>2</sub> O <sup>HS</sup> |
| Ser162                                                   | 0   | 1 | 2 | Asn158 <sup>MM</sup> Asn158 <sup>SM</sup> Leu166 <sup>MM</sup>                                |
| Asn336                                                   | 0.6 | 2 | 2 | Ser333 <sup>MM</sup> Ser333 <sup>SM</sup> Ile339 <sup>MM</sup> Asp340 <sup>MM</sup>           |
